# Supplementary material for: Functional Interactions of Kluyveromyces lactis Telomerase Reverse Transcriptase with the Three-Way Junction and the Template Domains of Telomerase RNA
Source: MDPI journal article supplement (doi:10.3390/ijms231810757), 2022-09-15
Supplement: s1 [file s1]

# Functional interactions of the yeast telomerase reverse transcriptase with the three-way junction and the template domains of telomerase RNA

Wasif Al-Shareef, Yogev Brown, Chris Bryan, Elena Shuvaeva, Shhadeh Bsoul, Raanan Greenman, Majdi M. Kabaha, Nikolai B. Ulyanov, Emmanuel Skordalakes and Yehuda Tzfati

## Supplementary Materials

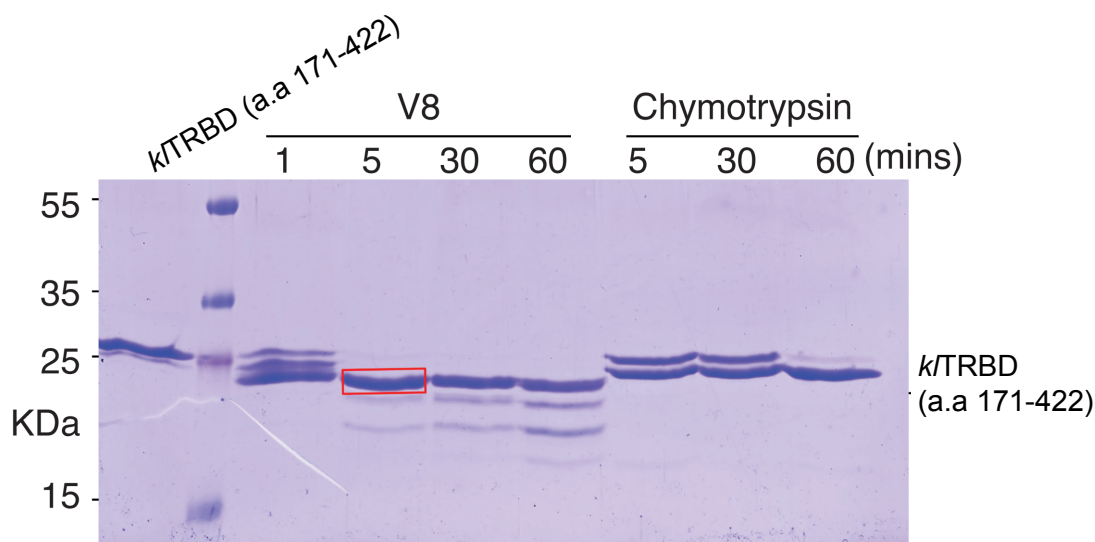

**Figure S1. *k*/TRBD proteolysis.** The recombinant *k*/TRBD protein fragment defined by sequence alignment, *k*/TRBD (171-422), was incubated with V8 or chymotrypsin protease at 1:100 ratio (V8 : *k*/TRBD), for 1, 5, 30 and 60mins. The reaction was stopped by incubating the sample with SDS loading buffer and run on an SDS PAGE gel. The band marked by a red box was analyzed by mass spectrometry and found to consist of residues 171-404.

minTWJ, dG = -40.00

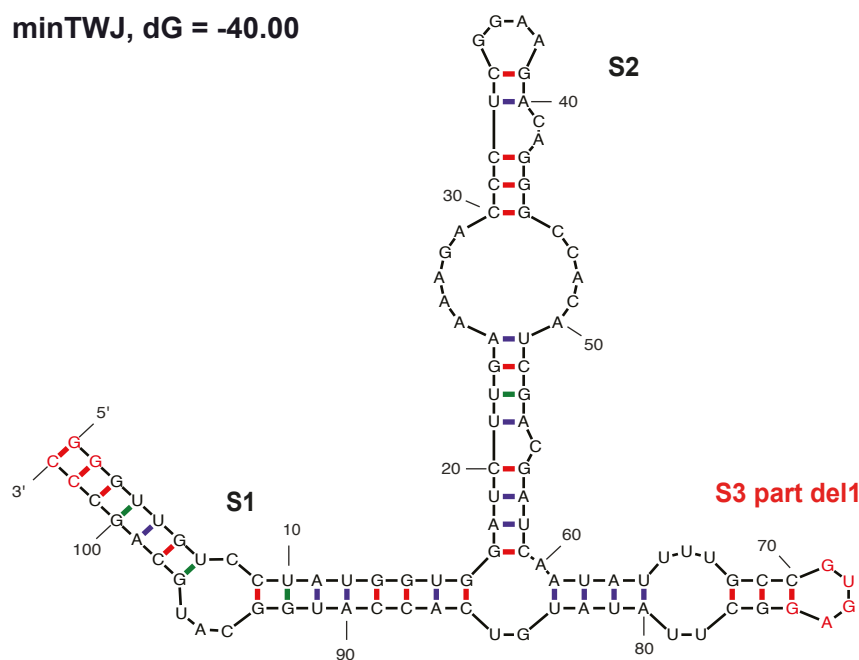

minTWJ $\Delta$ S2, dG = -34.90

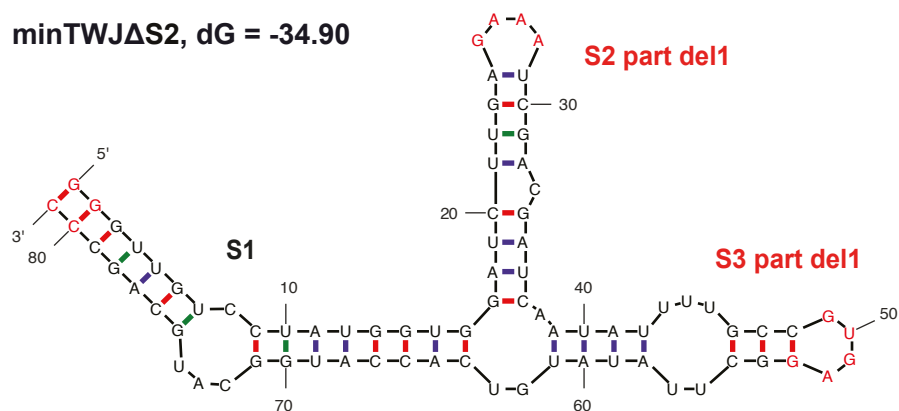

minTWJ $\Delta$ S1 $\Delta$ S2, dG = -26.60

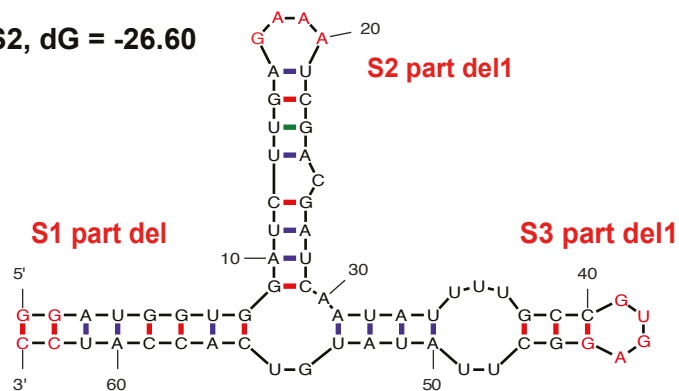

**Figure S2. *In vitro* transcribed minTWJ RNA constructs.** Structures and minimal energies (dG) of minTWJ, minTWJ $\Delta$ S2 and minTWJ $\Delta$ S1 $\Delta$ S2 were predicted by *mfold*. Indicated in red are nucleotides substituted from the native TWJ sequence.

**Table S1. TER1 mutations summary.**

| Name                       | TWJ Element                    | Position within TER1 | WT sequence    | Inserted sequence | Telomere length (% of WT) | Description                                                   |
|----------------------------|--------------------------------|----------------------|----------------|-------------------|---------------------------|---------------------------------------------------------------|
| S1 top                     | Stem 1                         | 1083-6               | GGU            | CCA               | 40                        | Transversion substitution in CS5a and stem 1                  |
| S1 bottom                  | Stem 1                         | 1224-6               | ACC            | UGG               | 40, REC                   | Transversion substitution in CS6 and stem 1                   |
| S1 comp                    | Stem 1                         | 1083-6<br>1224-6     | GGU<br>ACC     | CCA<br>UGG        | 95                        | S1 top+S1 bottom                                              |
| S2 top                     | Stem 2                         | 1088-90              | AUC            | UAG               | 90                        | Transversion substitution in CS5a and stem 2                  |
| S2 bottom                  | Stem 2                         | 1126-8               | GUA            | CUA               | 50                        | Transversion substitution in CS5 and stem 2                   |
| S2 comp                    | Stem 2                         | 1088-90<br>1126-8    | AUC<br>GUA     | UAG<br>CUA        | 100                       | S2 top+S2 bottom                                              |
| S2 part del                | Stem 2                         | 1091-125             | 35 nt          | Del +GAAA         | 85                        | Partial deletion of stem 2 + tetraloop                        |
| S2 del                     | Stem 2                         | 1087-129             | 43             | Del               | 30                        | Deletion of stem 2                                            |
| S3 part del1               | Stem 3                         | 1141-212             | 72 nt          | Del + GUGAG       | 100                       | Partial deletion of stem 3 + tetraloop                        |
| S3 part del2               | Stem 3                         | 1139-213             | 75 nt          | Del               | 75                        | Partial deletion of stem 3                                    |
| S2 part del + S3 part del2 | Stem 2<br>Stem 3               | 1091-125<br>1139-213 | 35 nt<br>75 nt | Del +GAAA<br>Del  | 55                        | Partial deletions in stem 2 and stem 3                        |
| IL U2>G3                   | Stem 3                         | 1215-7               | AUU            | GGG               | 50                        | Substitution in the internal loop                             |
| IL U2>G3 +IL U3>C3         | Stem 3                         | 1215-7<br>1135-7     | AUU<br>UUU     | GGG<br>CCC        | REC                       | Closure of the internal loop with three G-C bp                |
| hP6.1                      | Stem 3                         | 1132-219             | 88 nt          | GAGUUGG<br>GCUC   | 65                        | Replacement all stem 3 with the human P6.1                    |
| S3 del                     | Stem 3                         | 1130-222             | 93             | Del               | 30                        | Deletion of stem 2                                            |
| S3 C>AG                    | Stem 3                         | 1212                 | C              | AG                | 90                        | Transversion substitution in stem 3 to pair the internal loop |
| S3 C>G                     | Stem 3                         | 1140                 | C              | G                 | 90                        | Transversion substitution in stem 3 to pair the internal loop |
| L1 ins                     | Stem 1 -<br>Stem 2<br>Junction | 1186-                | -              | CC                | 40                        | Insertion of linker 1                                         |
| L2 del                     | Stem 2 -<br>Stem 3<br>Junction | 1130                 | A              | Del               | 35                        | Deletion of linker 2                                          |
| L3 del                     | Stem 1 -<br>Stem 3<br>Junction | 1221-2               | GU             | Del               | 40                        | Deletion of linker 3                                          |

REC, alternative recombination pathway for telomere maintenance

Del, deletion
